# Supplementary material for: Eco-friendly and mechanochemically functionalised graphene with quick and high water dispersibility
Source: Royal Society of Chemistry journal article supplement (doi:10.1039/d2qm00310d), 2022-01-01
Supplement: d2qm00310d1.pdf [file d2qm00310d1.pdf]

## SUPPORTING INFORMATION

### Eco-Friendly and Mechanochemically Functionalised Graphene with Quick and High Water Dispersibility

Sepidar Sayyar<sup>1,2\*</sup>, Jo Law<sup>3</sup>, Agnieszka Golda<sup>3</sup>, Greg Ryder<sup>1,2</sup> and Gordon Wallace<sup>1,2</sup>

<sup>1</sup>ARC Centre of Excellence for Electromaterials Science (ACES), Intelligent Polymer Research Institute (IPRI), AII Facility, University of Wollongong, Wollongong, NSW 2522, Australia.

<sup>2</sup>Australian National Fabrication Facility – Materials Node, Innovation Campus, University of Wollongong, Wollongong, NSW 2500, Australia.

<sup>3</sup>Faculty of Law, Humanities and the Arts, School of the Arts, English and Media, University of Wollongong, Wollongong, NSW 2500, Australia.

[\*] Corresponding authors: sepidar@uow.edu.au

SEM images of a) EG4, b) GFMN10.54 and c) GFMN126 demonstrating that these samples have not resulted in better exfoliation and fragmentation compared to GFMN114.

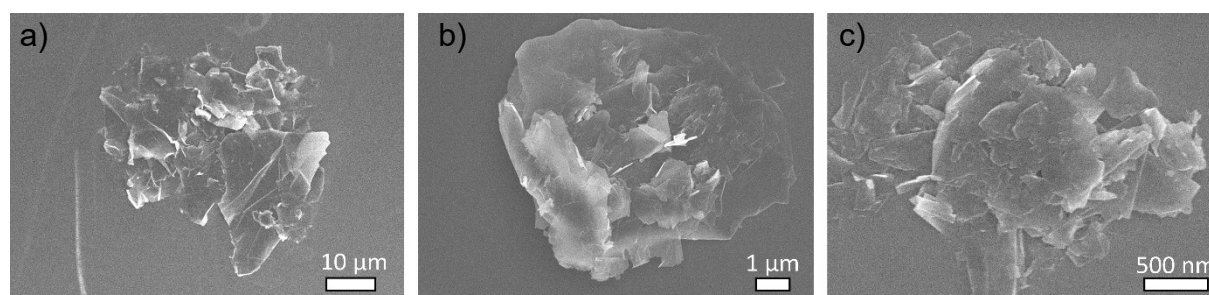

Figure S1. Ball-milled graphite samples. a) EG4, b) GFMN10.54 and c) GFMN126.

Table S1. The values of atomic concentrations of O1s, C1s, N1s, P2p and C/O ratios obtained by XPS survey spectra

| Sample    | O1s (%) | C1s (%) | N1s (%) | P2p (%) | C/O ratio |
|-----------|---------|---------|---------|---------|-----------|
| EG        | 2.05    | 97.95   | -       | -       | 47.8      |
| EG 2      | 2.04    | 97.93   | -       | -       | 48.0      |
| EG 4      | 2.09    | 97.9    | -       | -       | 46.8      |
| EG 6      | 2.1     | 97.9    | -       | -       | 46.6      |
| GFMN112   | 2.05    | 97.71   | 0.21    | 0.03    | 47.7      |
| GFMN114   | 3.2     | 96.15   | 0.5     | 0.14    | 30.0      |
| GFMN116   | 2.53    | 97.17   | 0.25    | 0.05    | 38.4      |
| GFMN10.54 | 2.2     | 97.7    | 0.1     | 0.02    | 44.4      |

|         |      |      |      |      |      |
|---------|------|------|------|------|------|
| GFMN126 | 2.82 | 96.6 | 0.48 | 0.09 | 34.3 |
|---------|------|------|------|------|------|

Table S2.  $I_D/I_G$  ratios of EG and ball-milled samples

| Sample    | $I_D/I_G$ |
|-----------|-----------|
| EG        | 0.05      |
| EG2       | 0.08      |
| EG 4      | 0.12      |
| EG 6      | 0.18      |
| GFMN112   | 0.15      |
| GFMN114   | 0.43      |
| GFMN116   | 0.25      |
| GFMN10.54 | 0.15      |
| GFMN126   | 0.2       |
